# Supplementary material
Source: MDPI journal article supplement (https://www.mdpi.com/1999-4907/7/11/286)
Supplement: s1 [file s1]

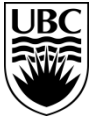

## Participant Job Titles

Implementation of Marker-Assisted Selection in BC Forests: Perception Survey

### Participant Job Titles

| Participant Group | Job Title                             |
|-------------------|---------------------------------------|
| Government        | Silviculture specialist               |
| Government        | Silviculture specialist               |
| Government        | Forest genetics manager               |
| Government        | Forest geneticist                     |
| Government        | Forest geneticist                     |
| Government        | Molecular and tree geneticist         |
| Government        | Branch director                       |
| Government        | Seed policy officer                   |
| Government        | Program manager                       |
| ENGOS             | Organization director                 |
| ENGOS             | Forest and climate campaigner         |
| ENGOS             | Terrestrial campaign director         |
| ENGOS             | Senior Science and policy advisor     |
| Industry          | Senior silviculturist                 |
| Industry          | Silviculture consultant               |
| Industry          | Operations forester                   |
| Industry          | Operations forester                   |
| Industry          | Forest investment account coordinator |
| Industry          | Seed orchard supervisor               |
| First Nations     | Band office president                 |
| First Nations     | Aboriginal coordinator                |
| First Nations     | First Nations advisor                 |
| First Nations     | Natural resources referral worker     |
| First Nations     | Planning forester                     |
| First Nations     | Aboriginal resource advisory CEO      |
