# Supplementary material
Source: MDPI journal article supplement (https://www.mdpi.com/1999-4907/7/11/286)
Supplement: s1 [file s1]

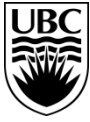

## Interview Guide

Implementation of Marker-Assisted Selection in BC Forests: Perception Survey

### INTERVIEW GUIDE:

Implementation of Marker-Assisted Selection in BC Forests: Perception Survey

#### Part A: Pre-Video

1) Can you tell me briefly about your experience in the forest sector?

*Probe:* Organizations; duration; interests

2) What organization do you represent now and what is your role?

*Follow-up:* what role do you have in silviculture?

3) What is the scope of activities of this organization?

*Probe:* Mission; objectives

4) What is your familiarity with forest genomics? [Novice, intermediate, expert]

*Follow-up:* What is your familiarity with marker-assisted selection?

\*\*\*Elevate understanding, if necessary – [Watch educational package video](#)\*\*\*

#### Part B: Post-Video

5) What is your first impression of marker-assisted selection? [Positive/negative]

6) What advantages, if any, do you perceive in the use of MAS in forestry?

*Probe:* Explain.

7) What issues, if any, do you perceive in the use of MAS in forestry?

*Probe:* Explain.

8) Specifically, what use, if any, would MAS be to you and your organization?

*Probe:* Potential benefits/costs?

9) Given that MAS is a genomic tool, what is your organization's attitude about the use of genomic tools in the forests of BC?

*Follow-up:* What do you expect your organization's attitude will be about the use of MAS in BC?
