# Supplementary material
Source: MDPI journal article supplement (https://www.mdpi.com/1999-4907/7/11/286)
Supplement: s1 [file s1]

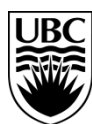

## Interview Guide

### Implementation of Marker-Assisted Selection in BC Forests: Perception Survey

Please complete both sides of the following questionnaire and submit it back to your interviewer, within a week following your interview.

#### Pre-Video:

Marker-Assisted Selection is:

- A) A technique used to transfer genetic material between organisms
- B) A technique used to assess whether specific genes have been passed from parent to offspring
- C) A technique used to accelerate tree breeding
- D) B & C
- E) Don't know

#### Respondent Information:

|                                                        |             |             |                 |               |           |
|--------------------------------------------------------|-------------|-------------|-----------------|---------------|-----------|
| <i>Name of Participant:</i>                            |             |             |                 |               |           |
| <i>Age</i>                                             | 18-30 years | 31-40 years | 41-50 years     | 51-60 years   | 60+ years |
| <i>Gender</i>                                          | Male        | Female      |                 |               |           |
| <i>Residence</i>                                       | Urban       | Rural       |                 |               |           |
| <i>Education</i>                                       | High School | Diploma     | Bachelor Degree | Master Degree | PhD       |
| <i>If applicable, please state discipline of study</i> |             |             |                 |               |           |

#### Post-Video:

Marker-Assisted Selection is:

- A) A technique used to transfer genetic material between organisms
- B) A technique used to assess whether specific genes have been passed from parent to offspring
- C) A technique used to accelerate tree breeding
- D) B & C
- E) Don't know

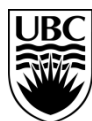

| <b>Questions on Marker-Assisted Selection:</b>                                                                                               | <b>Strongly Agree</b> | <b>Agree</b> | <b>Neutral</b> | <b>Disagree</b> | <b>Strongly Disagree</b> |
|----------------------------------------------------------------------------------------------------------------------------------------------|-----------------------|--------------|----------------|-----------------|--------------------------|
| 1) Generally speaking, I think that the following institutions <i>would</i> be interested in implementing marker-assisted selection in BC... |                       |              |                |                 |                          |
| (a) Provincial Government                                                                                                                    | 1                     | 2            | 3              | 4               | 5                        |
| (b) Forest industries                                                                                                                        | 1                     | 2            | 3              | 4               | 5                        |
| (c) Environmental groups                                                                                                                     | 1                     | 2            | 3              | 4               | 5                        |
| (d) First Nations                                                                                                                            | 1                     | 2            | 3              | 4               | 5                        |
| (e) Private landholders                                                                                                                      | 1                     | 2            | 3              | 4               | 5                        |
| (f) Municipal government                                                                                                                     | 1                     | 2            | 3              | 4               | 5                        |
| 2) Generally speaking, I think that the following institutions <i>should</i> be interested in implementing MAS in BC...                      |                       |              |                |                 |                          |
| (a) Provincial government                                                                                                                    | 1                     | 2            | 3              | 4               | 5                        |
| (b) Forest industries                                                                                                                        | 1                     | 2            | 3              | 4               | 5                        |
| (c) Environmental groups                                                                                                                     | 1                     | 2            | 3              | 4               | 5                        |
| (d) First Nations                                                                                                                            | 1                     | 2            | 3              | 4               | 5                        |
| (e) Private landholders                                                                                                                      | 1                     | 2            | 3              | 4               | 5                        |
| (f) Municipal government                                                                                                                     | 1                     | 2            | 3              | 4               | 5                        |
| 3) I think that the advantages of MAS outweigh the disadvantages                                                                             | 1                     | 2            | 3              | 4               | 5                        |
| 4) My attitude towards the use of MAS in the forests of BC is positive                                                                       | 1                     | 2            | 3              | 4               | 5                        |
| 5) I support the continued investigation and research in genomic technologies                                                                | 1                     | 2            | 3              | 4               | 5                        |
| 6) I support the implementation of MAS in BC forests                                                                                         | 1                     | 2            | 3              | 4               | 5                        |
| 7) I think that MAS, if used in a forest management framework in BC, could be a useful tool for...                                           |                       |              |                |                 |                          |
| (a) Increasing timber production volume                                                                                                      | 1                     | 2            | 3              | 4               | 5                        |
| (b) Increasing timber quality                                                                                                                | 1                     | 2            | 3              | 4               | 5                        |
| (c) Promoting the conservation of genetic resource diversity                                                                                 | 1                     | 2            | 3              | 4               | 5                        |
| (d) Mitigating the impacts of climate change through carbon sequestration                                                                    | 1                     | 2            | 3              | 4               | 5                        |
| (e) Adding value to wood products                                                                                                            | 1                     | 2            | 3              | 4               | 5                        |
| (f) Increasing conservation areas                                                                                                            | 1                     | 2            | 3              | 4               | 5                        |
| (g) Rehabilitating sites and/or degraded stands                                                                                              | 1                     | 2            | 3              | 4               | 5                        |

Please feel free to include any additional thoughts or comments in the box provided on the next page.

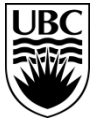

## Interview Guide

### Implementation of Marker-Assisted Selection in BC Forests: Perception Survey

Please feel free to include any additional thoughts or comments in the box provided below.
